# Supplementary material for: High Prevalence of Coinfecting Enteropathogens in Suspected Rotavirus Vaccine Breakthrough Cases
Source: PubMed Central journal article supplement (PMC8601229; doi:10.1128/jcm.01236-21), 2021-11-18
Supplement: jcm.01236-21-s0001.pdf [file jcm.01236-21-s0001.pdf]

## Supplementary Tables and Figures

Table S1. Demographics and sequencing characteristics of the rotavirus vaccine breakthrough samples (n=102). Median age in months, mean number of raw reads, mean number of QC (quality controlled) reads, total number of raw reads and total number of QC reads are shown at the bottom. The samples marked with asterisks were not part of the RT-qPCR analyses. IQR: interquartile range.

| Sample ID | Year of sample collection | Sex  | Age at sample collection (month) | Time between last Rotarix vaccination and sample collection (month) | Illumina Sequencing platform | Raw reads  | QC reads   | Rotavirus genotype |
|-----------|---------------------------|------|----------------------------------|---------------------------------------------------------------------|------------------------------|------------|------------|--------------------|
| F00325    | 2007-2008                 | F    | 15                               | 12                                                                  | NextSeq                      | 5,453,778  | 4,406,536  | G2P[4]             |
| F00371*   | 2007-2008                 | F    | 19                               | 16                                                                  | NextSeq                      | 4,386,252  | 3,418,164  | G1P[8]             |
| F00372*   | 2007-2008                 | M    | 20                               | 15                                                                  | NextSeq                      | 3,497,962  | 2,778,664  | G9P[8]             |
| F00374*   | 2007-2008                 | M    | 20                               | 15                                                                  | NovaSeq                      | 7,839,812  | 6,335,850  | G9P[8]             |
| F00396    | 2007-2008                 | M    | 16                               | 13                                                                  | NextSeq                      | 6,113,596  | 5,355,736  | G2P[4]             |
| F00440    | 2007-2008                 | F    | 12                               | 8                                                                   | NextSeq                      | 6,464,652  | 4,286,022  | G2P[4]             |
| F00442    | 2007-2008                 | M    | 12                               | 7                                                                   | NextSeq                      | 6,118,504  | 4,627,708  | G2P[4]             |
| F00450*   | 2007-2008                 | F    | 20                               | 15                                                                  | NextSeq                      | 4,864,644  | 4,049,438  | G2P[4]             |
| F00455    | 2007-2008                 | M    | 17                               | 13                                                                  | NextSeq                      | 3,969,616  | 3,428,762  | G2P[4]             |
| F00495    | 2007-2008                 | M    | 10                               | 5                                                                   | NextSeq                      | 6,128,198  | 5,217,640  | G2P[4]             |
| F01005    | 2008-2009                 | M    | 14                               | 11                                                                  | NextSeq                      | 4,791,888  | 3,640,842  | G2P[4]             |
| F01097    | 2008-2009                 | F    | 11                               | 8                                                                   | NextSeq                      | 7,554,272  | 5,545,898  | G2P[4]             |
| F01219    | 2008-2009                 | M    | 12                               | 10                                                                  | NextSeq                      | 6,335,984  | 4,038,934  | G9P[8]             |
| F01223*   | 2008-2009                 | M    | 6                                | 2                                                                   | NextSeq                      | 5,372,482  | 4,477,742  | G9P[8]             |
| F01260    | 2008-2009                 | F    | 24                               | 21                                                                  | NovaSeq                      | 7,200,048  | 5,784,752  | G3P[8]             |
| F01269    | 2008-2009                 | F    | 21                               | 17                                                                  | NextSeq                      | 6,119,802  | 5,235,520  | G2P[4]             |
| F01387*   | 2008-2009                 | Unk. | 8                                | 5                                                                   | NovaSeq                      | 11,694,442 | 10,047,412 | G2P[6]             |
| F01443    | 2008-2009                 | F    | 11                               | 8                                                                   | NextSeq                      | 5,140,790  | 4,184,690  | G1P[8] and G2P[4]  |
| F01450    | 2008-2009                 | M    | 21                               | 17                                                                  | NextSeq                      | 5,819,420  | 4,647,978  | G2P[4]             |
| F01552*   | 2008-2009                 | M    | 33                               | 27                                                                  | NextSeq                      | 5,061,388  | 4,540,214  | G2P[4]             |
| F02114    | 2009-2010                 | M    | 20                               | 17                                                                  | NextSeq                      | 7,047,886  | 5,400,544  | G2P[4]             |
| F02133    | 2009-2010                 | F    | 28                               | 25                                                                  | NextSeq                      | 9,058,684  | 6,708,042  | G2P[4]             |
| F02146    | 2009-2010                 | M    | 14                               | 10                                                                  | NextSeq                      | 6,050,646  | 5,212,260  | G2P[4]             |
| F02269*   | 2009-2010                 | F    | 21                               | 18                                                                  | NextSeq                      | 4,627,172  | 3,914,954  | G1P[8]             |
| F02272    | 2009-2010                 | M    | 20                               | 16                                                                  | NextSeq                      | 4,756,342  | 3,748,464  | G1P[8] and G2P[4]  |
| F02290    | 2009-2010                 | F    | 33                               | 29                                                                  | NextSeq                      | 6,839,296  | 5,487,460  | G1P[8]             |
| F02335    | 2009-2010                 | M    | 24                               | 21                                                                  | NextSeq                      | 3,331,466  | 2,854,282  | G1P[8]             |
| F02402    | 2009-2010                 | F    | 7                                | 4                                                                   | NovaSeq                      | 11,067,480 | 9,607,244  | G2P[4]             |
| F02576    | 2009-2010                 | M    | 50                               | 44                                                                  | NextSeq                      | 6,705,882  | 2,765,556  | G4P[8]             |
| F02577    | 2009-2010                 | M    | 21                               | 16                                                                  | NovaSeq                      | 22,180,398 | 18,674,986 | G3P[6]             |
| F03011*   | 2010-2011                 | F    | 10                               | 6                                                                   | NextSeq                      | 5,080,516  | 4,382,778  | G6P[14]            |
| F03061    | 2010-2011                 | M    | 6                                | 2                                                                   | NextSeq                      | 6,677,286  | 5,734,160  | G2P[4]             |
| F03069    | 2010-2011                 | M    | 9                                | 4                                                                   | NextSeq                      | 6,312,878  | 1,187,446  | G9P[8]             |
| F03127    | 2010-2011                 | M    | 16                               | 13                                                                  | NextSeq                      | 6,591,098  | 5,522,696  | G3P[4]             |

|         |           |      |    |    |         |            |            |                    |
|---------|-----------|------|----|----|---------|------------|------------|--------------------|
| F03146  | 2010-2011 | F    | 8  | 5  | NextSeq | 5,179,074  | 4,101,312  | G4P[8]             |
| F03159  | 2010-2011 | F    | 6  | 2  | NextSeq | 5,613,578  | 2,050,852  | G2P[4]             |
| F03160  | 2010-2011 | F    | 14 | 10 | NextSeq | 4,325,616  | 3,405,244  | G1P[8]             |
| F03165  | 2010-2011 | M    | 13 | 8  | NextSeq | 4,921,070  | 4,132,782  | G2P[4]             |
| F03173  | 2010-2011 | M    | 11 | 8  | NextSeq | 6,084,476  | 5,103,188  | G9P[8]             |
| F03214  | 2010-2011 | M    | 14 | 11 | NovaSeq | 15,014,930 | 13,325,050 | G1P[8] and G2P[4]  |
| F03268  | 2010-2011 | F    | 16 | 11 | NextSeq | 6,134,956  | 4,941,444  | G2P[4]             |
| F03297  | 2010-2011 | F    | 59 | 55 | NextSeq | 5,729,534  | 5,042,012  | G2P[4]             |
| F03394  | 2010-2011 | F    | 35 | 32 | NextSeq | 14,066,080 | 11,724,442 | G3P[8]             |
| F04024  | 2011-2012 | M    | 7  | 4  | NextSeq | 6,816,900  | 5,754,890  | G2P[4]             |
| F04047  | 2011-2012 | M    | 21 | 18 | NextSeq | 5,306,444  | 4,404,828  | G2P[4]             |
| F04056  | 2011-2012 | F    | 34 | 31 | NextSeq | 7,179,600  | 5,516,678  | G12P[8]            |
| F04071  | 2011-2012 | M    | 28 | 25 | NextSeq | 4,663,996  | 3,569,374  | G1P[8]             |
| F04099  | 2011-2012 | M    | 9  | 5  | NextSeq | 6,644,622  | 5,281,288  | G9P[8]             |
| F04114  | 2011-2012 | M    | 20 | 17 | NovaSeq | 22,482,210 | 19,971,762 | G2P[4]             |
| F04120  | 2011-2012 | F    | 11 | 5  | NextSeq | 5,387,180  | 4,466,628  | G9P[8]             |
| F04189  | 2011-2012 | M    | 21 | 16 | NovaSeq | 9,725,706  | 8,275,838  | G9P[8]             |
| F04226  | 2011-2012 | F    | 13 | 8  | NextSeq | 4,152,008  | 3,290,596  | G1P[8]             |
| F04268  | 2011-2012 | M    | 9  | 5  | NextSeq | 6,969,198  | 5,726,536  | G3P[8]             |
| F05025  | 2012-2013 | M    | 11 | 7  | NextSeq | 10,218,992 | 8,562,184  | G9P[8]             |
| F05040  | 2012-2013 | F    | 17 | 13 | NextSeq | 7,690,002  | 5,436,352  | G4P[8]             |
| F05073  | 2012-2013 | F    | 5  | 2  | NextSeq | 13,942,494 | 11,052,346 | G12P[8] and G2P[4] |
| F05189  | 2012-2013 | M    | 38 | 36 | NextSeq | 6,809,540  | 5,499,944  | G2P[4]             |
| F05209  | 2012-2013 | F    | 15 | 12 | NextSeq | 6,695,072  | 1,994,958  | G3P[8]             |
| F05244  | 2012-2013 | M    | 21 | 17 | NextSeq | 5,841,152  | 4,651,722  | G3P[8]             |
| F05339  | 2012-2013 | F    | 27 | 24 | NextSeq | 3,816,188  | 2,889,080  | G2P[4]             |
| F05363  | 2012-2013 | M    | 26 | 22 | NextSeq | 7,743,858  | 6,234,022  | G3P[8]             |
| F05466  | 2012-2013 | M    | 33 | 26 | NextSeq | 6,864,914  | 5,804,456  | G2P[4]             |
| F05504  | 2012-2013 | M    | 11 | 6  | NextSeq | 4,564,188  | 3,549,558  | G1P[8]             |
| F05527  | 2012-2013 | F    | 11 | 8  | NovaSeq | 14,360,232 | 12,150,506 | G2P[4]             |
| F06011  | 2013-2014 | M    | 52 | 49 | NextSeq | 5,716,808  | 4,761,210  | G2P[4]             |
| F06040  | 2013-2014 | M    | 20 | 15 | NextSeq | 6,174,892  | 5,242,310  | G1P[8]             |
| F06047  | 2013-2014 | M    | 14 | 11 | NextSeq | 3,930,536  | 2,916,644  | G3P[8]             |
| F06083  | 2013-2014 | F    | 57 | 54 | NextSeq | 6,916,620  | 4,956,514  | G2P[4]             |
| F06088  | 2013-2014 | M    | 8  | 16 | NovaSeq | 22,844,448 | 19,708,014 | G1P[8]             |
| F06107  | 2013-2014 | F    | 21 | 18 | NextSeq | 2,004,490  | 1,451,602  | G9P[8]             |
| F06118  | 2013-2014 | M    | 7  | 4  | NextSeq | 5,449,422  | 4,511,916  | G2P[4]             |
| F06184* | 2013-2014 | F    | 84 | 81 | NextSeq | 1,096,802  | 863,210    | G12P[8]            |
| F07027  | 2014-2015 | M    | 19 | 16 | NextSeq | 8,856,718  | 6,897,804  | G4P[8]             |
| F07049  | 2014-2015 | F    | 7  | 4  | NextSeq | 7,556,064  | 5,620,180  | G3P[8]             |
| F07067  | 2014-2015 | Unk. | 11 | 8  | NovaSeq | 7,417,542  | 6,367,122  | G12P[8]            |
| F07135  | 2014-2015 | M    | 11 | 8  | NextSeq | 6,640,530  | 5,445,126  | G3P[8]             |
| F07168  | 2014-2015 | M    | 25 | 22 | NextSeq | 6,726,600  | 5,445,596  | G3P[8]             |
| F07215  | 2014-2015 | M    | 24 | 20 | NextSeq | 7,969,816  | 6,258,304  | G3P[8]             |

|                     |           |   |            |    |         |              |             |         |
|---------------------|-----------|---|------------|----|---------|--------------|-------------|---------|
| F07246              | 2014-2015 | M | 23         | 20 | NextSeq | 6,949,114    | 5,640,688   | G4P[8]  |
| F07264              | 2014-2015 | F | 24         | 20 | NextSeq | 8,348,984    | 6,288,934   | G12P[8] |
| F07312              | 2014-2015 | M | 15         | 12 | NextSeq | 4,228,800    | 2,829,952   | G2P[4]  |
| F09155              | 2016-2017 | F | 22         | 19 | NextSeq | 6,840,762    | 5,851,048   | G9P[8]  |
| F09179              | 2016-2017 | F | 18         | 14 | NextSeq | 7,849,094    | 6,342,900   | G2P[4]  |
| F09181              | 2016-2017 | F | 23         | 18 | NextSeq | 8,196,978    | 7,327,100   | G2P[4]  |
| F09229              | 2016-2017 | F | 26         | 23 | NextSeq | 7,656,414    | 6,095,436   | G2P[4]  |
| F09256              | 2016-2017 | F | 12         | 8  | NextSeq | 7,595,214    | 6,277,476   | G2P[4]  |
| F09263              | 2016-2017 | M | 91         | 88 | NextSeq | 5,831,356    | 4,518,436   | G2P[4]  |
| F09271              | 2016-2017 | M | 34         | 31 | NextSeq | 5,229,632    | 4,193,560   | G9P[8]  |
| F09274              | 2016-2017 | M | 24         | 21 | NextSeq | 6,071,442    | 4,745,648   | G9P[8]  |
| F09317              | 2016-2017 | M | 52         | 48 | NextSeq | 7,968,776    | 6,084,018   | G1P[6]  |
| F09648              | 2016-2017 | M | 17         | 14 | NextSeq | 6,046,962    | 4,949,710   | G1P[8]  |
| F09649              | 2016-2017 | M | 50         | 47 | NextSeq | 8,391,372    | 6,621,524   | G9P[8]  |
| F09825              | 2016-2017 | M | 55         | 51 | NextSeq | 5,481,294    | 4,591,514   | G3P[8]  |
| F10090              | 2017-2018 | F | 56         | 53 | NextSeq | 12,728,862   | 10,796,262  | G9P[8]  |
| F10119              | 2017-2018 | M | 15         | 11 | NextSeq | 11,077,134   | 9,557,330   | G2P[4]  |
| F10168              | 2017-2018 | F | 46         | 42 | NextSeq | 8,113,250    | 6,504,822   | G3P[8]  |
| F10178              | 2017-2018 | M | 9          | 6  | NextSeq | 6,628,430    | 5,508,922   | G3P[8]  |
| F10181              | 2017-2018 | F | 27         | 24 | NextSeq | 6,507,094    | 4,721,984   | G1P[8]  |
| F10188              | 2017-2018 | M | 39         | 36 | NextSeq | 7,907,220    | 6,323,214   | G4P[8]  |
| F10257              | 2017-2018 | F | 26         | 23 | NextSeq | 5,812,968    | 1,264,090   | G3P[8]  |
| F10258              | 2017-2018 | M | 40         | 37 | NextSeq | 6,798,616    | 5,042,866   | G3P[8]  |
| F10324              | 2017-2018 | M | 48         | 45 | NextSeq | 8,274,204    | 6,110,782   | G3P[8]  |
| <b>Median (IQR)</b> |           |   |            |    |         | <b>Mean</b>  |             |         |
|                     |           |   | 20 (11-26) |    |         | 7,225,820    | 5,723,461   |         |
|                     |           |   |            |    |         | <b>Total</b> |             |         |
|                     |           |   |            |    |         | 737,033,630  | 583,793,014 |         |

Table S2. Cq values of identified enteropathogens and internal controls by RT-qPCR assay per sample (n=92). The Cq values of the enteropathogens are color-coded according to their clinical interpretation; strong positive to weak positive transitions from dark green to light green (see below, Table S6). The given scores per pathogen are shown in brackets. IC: Internal control, PDV: Phocine distemper virus, IQR: interquartile range

| Sample ID | Rotavirus | Adenovirus | Astrovirus | Enterovirus | Parechovirus | Norovirus | Sapovirus | <i>C. jejuni</i> | <i>C. difficile</i> | EAEC      | EPEC      | STEC | <i>Blastocystis</i> spp. | <i>D. fragilis</i> | <i>G. lamblia</i> | 18S rRNA IC | PDV IC |
|-----------|-----------|------------|------------|-------------|--------------|-----------|-----------|------------------|---------------------|-----------|-----------|------|--------------------------|--------------------|-------------------|-------------|--------|
| F00325    | 19.24 (3) |            |            | 25.03 (2)   |              | 30.11 (1) |           |                  |                     |           |           |      |                          |                    |                   | 15.35       | 28.87  |
| F00396    | 22.50 (2) | 20.72 (3)  |            |             |              |           | 31.73 (1) |                  | 30.53 (2)           |           |           |      |                          |                    |                   | 22.09       | 31.65  |
| F00440    | 17.90 (3) |            |            |             |              |           |           |                  |                     |           |           |      |                          | 35.14 (1)          |                   | 24.92       | 30.57  |
| F00442    | 26.16 (2) |            |            |             | 33.01 (2)    |           |           |                  |                     |           |           |      |                          |                    |                   | 31.87       | 32.93  |
| F00455    | 28.00 (2) |            |            |             |              |           |           |                  |                     |           |           |      |                          |                    |                   | 22.88       | 27.96  |
| F00495    | 21.84 (3) | 32.19 (1)  |            |             |              |           |           |                  |                     |           |           |      |                          |                    |                   | 19.69       | 29.50  |
| F01005    | 24.16 (2) |            |            |             |              |           |           |                  |                     |           |           |      |                          |                    |                   | 17.74       | 30.05  |
| F01097    | 14.33 (3) |            |            |             |              |           |           |                  |                     |           |           |      |                          |                    |                   | 19.81       | 31.22  |
| F01219    | 21.85 (3) |            |            |             |              | 35.39 (1) |           |                  |                     |           |           |      |                          |                    |                   | 18.84       | 28.81  |
| F01260    | 21.78 (3) | 32.22 (1)  |            |             |              |           |           |                  |                     |           |           |      |                          |                    |                   | 24.91       | 30.76  |
| F01269    | 21.59 (3) | 28.93 (2)  |            |             |              |           |           |                  |                     |           |           |      |                          |                    |                   | 27.20       | 30.78  |
| F01443    | 19.55 (3) |            |            | 28.63 (2)   |              |           |           |                  | 31.79 (2)           |           |           |      |                          |                    |                   | 25.37       | 28.14  |
| F01450    | 14.34 (3) | 29.58 (2)  |            |             |              |           |           |                  |                     | 17.73 (3) |           |      |                          |                    |                   | 20.91       | 28.47  |
| F02114    | 16.95 (3) |            |            |             |              |           |           |                  |                     |           | 26.43 (2) |      |                          |                    |                   | 26.30       | 32.84  |
| F02133    | 22.37 (2) |            |            | 36.07 (1)   |              |           |           |                  |                     | 16.76 (3) |           |      |                          |                    | 32.42 (2)         | 22.14       | 30.74  |
| F02146    | 19.43 (3) | 27.94 (2)  |            |             |              |           |           |                  |                     | 35.13 (1) |           |      |                          |                    |                   | 18.64       | 28.22  |
| F02272    | 19.98 (3) |            |            | 33.83 (1)   |              |           |           |                  |                     |           | 18.45 (3) |      |                          |                    |                   | 20.41       | 27.84  |
| F02290    | 20.57 (3) |            |            |             |              |           |           |                  |                     |           |           |      |                          |                    |                   | 20.58       | 31.27  |
| F02335    | 16.54 (3) |            |            |             |              |           |           |                  |                     |           |           |      |                          |                    |                   | 18.50       | 29.36  |
| F02402    | 22.75 (2) | 23.39 (2)  |            | 28.52 (2)   |              |           | 28.70 (2) |                  | 28.40 (2)           |           |           |      |                          |                    |                   | 20.94       | 29.46  |
| F02576    | 20.17 (3) |            |            |             |              |           |           |                  |                     | 17.60 (3) | 20.58 (3) |      |                          |                    |                   | 26.62       | 30.63  |
| F02577    | 23.31 (2) |            |            | 31.60 (1)   |              |           |           |                  |                     |           |           |      |                          |                    |                   | 19.73       | 30.66  |





|        |           |           |           |  |           |           |  |  |  |           |           |           |           |  |              |            |
|--------|-----------|-----------|-----------|--|-----------|-----------|--|--|--|-----------|-----------|-----------|-----------|--|--------------|------------|
| F09649 | 26.68 (2) |           |           |  |           |           |  |  |  |           |           |           |           |  | 22.18        | 31.19      |
| F09825 | 23.14 (2) |           |           |  |           |           |  |  |  |           |           |           |           |  | 27.85        | 29.64      |
| F10090 | 18.85 (3) | 32.90 (1) |           |  |           |           |  |  |  |           |           | 34.25 (1) |           |  | 25.17        | 30.01      |
| F10119 | 18.65 (3) |           |           |  | 31.38 (2) |           |  |  |  | 24.15 (2) |           |           |           |  | 17.62        | 28.52      |
| F10168 | 17.85 (3) |           | 30.99 (1) |  |           | 31.96 (1) |  |  |  |           |           |           |           |  | 24.27        | 25.67      |
| F10178 | 20.69 (3) | 34.38 (1) |           |  |           | 35.37 (1) |  |  |  |           | 24.61 (2) |           |           |  | 23.51        | 29.31      |
| F10181 | 17.03 (3) |           |           |  |           |           |  |  |  |           |           |           |           |  | 21.36        | 29.10      |
| F10188 | 23.34 (2) |           |           |  |           |           |  |  |  |           |           |           | 34.21 (1) |  | 19.27        | 29.68      |
| F10257 | 20.30 (3) | 30.98 (1) |           |  |           |           |  |  |  |           |           |           |           |  | 25.92        | 30.70      |
| F10258 | 16.65 (3) |           |           |  |           |           |  |  |  |           |           |           | 28.00 (2) |  | 27.11        | 30.76      |
| F10324 | 24.23 (2) |           |           |  |           |           |  |  |  |           |           |           | 30.26 (1) |  | 24.46        | 31.42      |
|        |           |           |           |  |           |           |  |  |  |           |           |           |           |  | Median (IQR) |            |
|        |           |           |           |  |           |           |  |  |  |           |           |           |           |  | 23 (21-25)   | 30 (29-31) |

Table S3. Demographics of the patients harbouring the corresponding pathogens according to RT-qPCR data

| Characteristics             | Rotavirus | Adenovirus | Picornavirus | EAEC    | Astrovirus | EPEC    | <i>Blastocystis</i> spp. | Norovirus | <i>C. difficile</i> | <i>D. fragilis</i> | Sapovirus | <i>C. jejuni</i> | <i>G. lamblia</i> | STEC  |
|-----------------------------|-----------|------------|--------------|---------|------------|---------|--------------------------|-----------|---------------------|--------------------|-----------|------------------|-------------------|-------|
| <b>Total (%)</b>            | 92 (100)  | 29 (32)    | 20 (22)      | 13 (14) | 9 (10)     | 9 (10)  | 9 (10)                   | 8 (9)     | 8 (9)               | 8 (9)              | 7 (8)     | 4 (4)            | 4 (4)             | 1 (1) |
| <b>Sex</b>                  |           |            |              |         |            |         |                          |           |                     |                    |           |                  |                   |       |
| <b>Female (%)</b>           | 36 (39)   | 10 (34)    | 10 (50)      | 1 (8)   | 3 (33)     | 4 (44)  | 4 (44)                   | 3 (38)    | 3 (38)              | 4 (50)             | 3 (43)    | 1 (25)           | 3 (75)            | 1     |
| <b>Male (%)</b>             | 55 (60)   | 18 (62)    | 10 (50)      | 11 (85) | 5 (56)     | 5 (56)  | 5 (56)                   | 4 (50)    | 5 (62)              | 4 (50)             | 4 (57)    | 3 (75)           | 1 (25)            |       |
| <b>Unspecified (%)</b>      | 1 (1)     | 1 (3)      |              | 1 (8)   |            |         |                          | 1 (12)    |                     |                    |           |                  |                   |       |
| <b>Age (m, median (SD))</b> | 20 (15)   | 16 (11)    | 20 (7)       | 15 (15) | 13 (13)    | 20 (27) | 23 (26)                  | 24 (15)   | 9 (4)               | 31 (16)            | 17 (9)    | 13 (8)           | 31 (14)           | 56    |



Table S4. Enteropathogen prevalence. Panel A shows the prevalence of enteropathogens by both RT-qPCR and NGS data. Panel B shows the prevalence of multiple co-infections according to RT-qPCR data. Rotavirus is not shown as it was present in all samples.

| A. Enteropathogen        | RT-qPCR (n=92) | NGS (n=102) |
|--------------------------|----------------|-------------|
| Rotavirus                | 100%           | 83%         |
| Adenovirus               | 32%            | 5%          |
| Enterovirus              | 15%            | 5%          |
| EAEC                     | 14%            |             |
| Astrovirus               | 10%            | 7%          |
| EPEC                     | 10%            |             |
| <i>Blastocystis spp.</i> | 10%            |             |
| Parechovirus             | 9%             | 2%          |
| Norovirus                | 9%             |             |
| <i>C. difficile</i>      | 9%             |             |
| <i>D. fragilis</i>       | 9%             |             |
| Sapovirus                | 8%             | 1%          |
| <i>C. jejuni</i>         | 4%             |             |
| <i>G. lamblia</i>        | 4%             |             |
| STEC                     | 1%             |             |
| Aichivirus               |                | 1%          |
| Cardiovirus              |                | 1%          |
| Rhinovirus               |                | 1%          |

| B. Co-infections                                        | Prevalence |
|---------------------------------------------------------|------------|
| AdV + EAEC                                              | 4%         |
| NoV + EV                                                | 2%         |
| AdV + EPEC                                              | 2%         |
| AdV + EV + PeV                                          | 2%         |
| AdV + PeV                                               | 1%         |
| EV + EAEC                                               | 1%         |
| PeV + EAEC                                              | 1%         |
| HAstV + NoV                                             | 1%         |
| AdV + <i>C.jejuni</i>                                   | 1%         |
| AdV + <i>C. difficile</i>                               | 1%         |
| AdV + STEC                                              | 1%         |
| AdV + <i>Blastocystis</i>                               | 1%         |
| NoV + <i>C. difficile</i>                               | 1%         |
| SaV + <i>D. fragilis</i>                                | 1%         |
| EV + <i>C.difficile</i>                                 | 1%         |
| PeV + <i>C.jejuni</i>                                   | 1%         |
| EV + EPEC                                               | 1%         |
| EAEC + EPEC                                             | 1%         |
| EPEC + <i>Blastocystis</i>                              | 1%         |
| EPEC + <i>D. fragilis</i>                               | 1%         |
| AdV + NoV + EV                                          | 1%         |
| AdV + SaV + <i>C.difficile</i>                          | 1%         |
| AdV + NoV + EPEC                                        | 1%         |
| AdV + EV + <i>Blastocystis</i>                          | 1%         |
| AdV + <i>C.difficile</i> + EAEC                         | 1%         |
| AdV + <i>C. jejuni</i> + EAEC                           | 1%         |
| HAstV + <i>C. difficile</i> + <i>Blastocystis</i>       | 1%         |
| HAstV + <i>Blastocystis</i> + <i>G. lamblia</i>         | 1%         |
| EV + EAEC + <i>G. lamblia</i>                           | 1%         |
| EV + EPEC + <i>D. fragilis</i>                          | 1%         |
| AdV + HAstV + NoV + EAEC                                | 1%         |
| AdV + SaV + EV + <i>C.difficile</i>                     | 1%         |
| HAstV + <i>Blastocystis</i> + <i>C.difficile</i> + EAEC | 1%         |

Table S5. Discrepancies between NGS and RT-qPCR detection methods. The first category shows samples (and the corresponding Cq value) in which a viral pathogen was only detected using RT-qPCR. The Cq values are color-coded according to the clinical interpretation; strong positive to weak positive transitions from dark green to light green (see below, Table S6). The 2<sup>nd</sup> and 3<sup>rd</sup> categories indicate samples (and their raw read counts) in which only NGS analyses detected a viral pathogen. 'Expected' indicates that the pathogen(s) was not included in the RT-qPCR panel, and 'not expected' indicates that this pathogen would be expected to be also picked up by the RT-qPCR assay.

| Categories                                           | Sample | Adenovirus | Astrovirus | Enterovirus | Parechovirus | Norovirus   | Sapovirus    | Other Picornavirus | Rotavirus |
|------------------------------------------------------|--------|------------|------------|-------------|--------------|-------------|--------------|--------------------|-----------|
| Only qPCR detection (NGS read counts < 100 excluded) | F00325 |            |            | 25.03       |              | 30.11 (GI)  |              |                    |           |
|                                                      | F00396 |            |            |             |              |             | 31.73, 36.26 |                    |           |
|                                                      | F00442 |            |            |             | 33.01        |             |              |                    |           |
|                                                      | F00495 | 32.19      |            |             |              |             |              |                    |           |
|                                                      | F01219 |            |            |             |              | 35.39 (GI)  |              |                    |           |
|                                                      | F01260 | 32.22      |            |             |              |             |              |                    |           |
|                                                      | F01269 | 28.93      |            |             |              |             |              |                    |           |
|                                                      | F01450 | 29.58      |            |             |              |             |              |                    |           |
|                                                      | F02133 |            |            | 36.07       |              |             |              |                    |           |
|                                                      | F02146 | 27.94      |            |             |              |             |              |                    |           |
|                                                      | F02272 |            |            | 33.83       |              |             |              |                    |           |
|                                                      | F02402 |            |            |             |              |             | 28.70, 34.45 |                    |           |
|                                                      | F03127 | 34.24      |            |             |              |             |              |                    |           |
|                                                      | F03146 |            |            |             |              | 34.63       |              |                    |           |
|                                                      | F03165 |            | 21.95      |             |              |             |              |                    |           |
|                                                      | F03268 |            |            |             |              | 32.69       |              |                    |           |
|                                                      | F04024 | 35.54      |            |             |              |             |              |                    |           |
|                                                      | F04047 | 27.52      |            |             | 34.55        | 34.4        |              |                    |           |
|                                                      | F04056 |            |            |             | 34.38        |             |              |                    |           |
|                                                      | F04099 | 34.96      |            |             |              |             |              |                    |           |
|                                                      | F04114 |            |            |             | 33.8         |             |              |                    |           |
|                                                      | F04189 |            |            |             |              |             |              | 33.09              |           |
|                                                      | F05025 | 33.64      |            |             |              |             |              |                    |           |
|                                                      | F05040 |            |            |             |              |             |              | 27.79              | 28.61     |
|                                                      | F05189 |            |            |             | 33.9         |             | 31.94 (GII)  |                    |           |
|                                                      | F05209 | 34.49      |            |             |              |             |              |                    |           |
|                                                      | F05244 | 34.96      |            |             |              |             |              |                    |           |
|                                                      | F06011 | 33.46      |            |             |              |             |              |                    |           |
|                                                      | F06040 | 31.32      |            |             |              |             |              |                    |           |
|                                                      | F06047 |            |            | 36.5        |              |             |              |                    |           |
|                                                      | F06118 |            |            |             |              |             | 36.42 (GII)  |                    |           |
|                                                      | F07027 | 36.03      |            |             |              |             |              |                    |           |
| F07067                                               | 29.85  | 32.54      |            |             |              | 29.93 (GII) |              |                    |           |
| F07135                                               | 31.8   |            |            | 35.56       |              |             |              |                    |           |
| F07168                                               | 28.17  |            |            |             | 34.77        |             |              |                    |           |

|                                          |                                      |        |               |       |       |             |  |               |
|------------------------------------------|--------------------------------------|--------|---------------|-------|-------|-------------|--|---------------|
|                                          | F07215                               | 27.32  |               |       |       |             |  |               |
|                                          | F07246                               | 32.36  |               |       |       |             |  |               |
|                                          | F07264                               | 33.76  |               | 25.37 |       | 33.23 (GII) |  |               |
|                                          | F07312                               |        | 28.89         |       |       |             |  |               |
|                                          | F09155                               |        |               | 34.99 |       |             |  |               |
|                                          | F09179                               |        |               |       |       |             |  | 23.85         |
|                                          | F09181                               |        |               | 32.91 |       |             |  |               |
|                                          | F09271                               |        |               |       |       | 26.06       |  |               |
|                                          | F09648                               |        |               |       |       | 33.77       |  |               |
|                                          | F10090                               | 32.9   |               |       |       |             |  |               |
|                                          | F10119                               |        |               |       | 31.38 |             |  |               |
|                                          | F10168                               |        |               |       |       | 31.96 (GI)  |  |               |
|                                          | F10178                               | 34.38  |               |       |       | 35.37 (GII) |  |               |
|                                          | F10257                               | 30.98  |               |       |       |             |  |               |
|                                          | <b>Only NGS detection (expected)</b> | F01005 |               |       |       |             |  |               |
| F05504                                   |                                      |        |               |       |       |             |  | 44978 (SAFV3) |
| F02114                                   |                                      |        | 31073 (VA2)   |       |       |             |  |               |
| F02402                                   |                                      |        | 944964 (MLB1) |       |       |             |  |               |
| F02577                                   |                                      |        | 322 (MLB1)    |       |       |             |  |               |
| <b>Only NGS detection (not expected)</b> | F01097                               |        | 8493 (HAstV1) |       |       |             |  |               |

Table S6. Relationship between the Cq values and the clinical interpretation for the viruses (a, d), bacteria (b, d) and parasites (c) detected by RT-qPCR

| a. Cq value    | Clinical interpretation | Score |
|----------------|-------------------------|-------|
| <= 22          | Strong positive         | 3     |
| > 22 and <= 30 | Positive                | 2     |
| > 30 and < 40  | Weak positive           | 1     |
| >= 40          | Not detectable          |       |

| b. Cq value    | Clinical interpretation | Score |
|----------------|-------------------------|-------|
| <= 24          | Strong positive         | 3     |
| > 24 and <= 32 | Positive                | 2     |
| > 32 and < 40  | Weak positive           | 1     |
| >= 40          | Not detectable          |       |

| c. Cq value*                             | Clinical interpretation | Score |
|------------------------------------------|-------------------------|-------|
| < 20 <sup>a</sup>                        | Strong positive         | 3     |
| > 20 <sup>a</sup> and <= 30 <sup>b</sup> | Positive                | 2     |
| > 30 <sup>b</sup> and < 40               | Weak positive           | 1     |
| >= 40                                    | Not detectable          |       |

| d. Cq value <sup>†</sup> | Clinical interpretation | Score |
|--------------------------|-------------------------|-------|
| < 40                     | Positive                | 2     |
| >= 40                    | Not detectable          |       |

\*For *G. lamblia*, <sup>a</sup>25 and <sup>b</sup>35

<sup>†</sup>For Parechovirus and *C. difficile*

# VP4

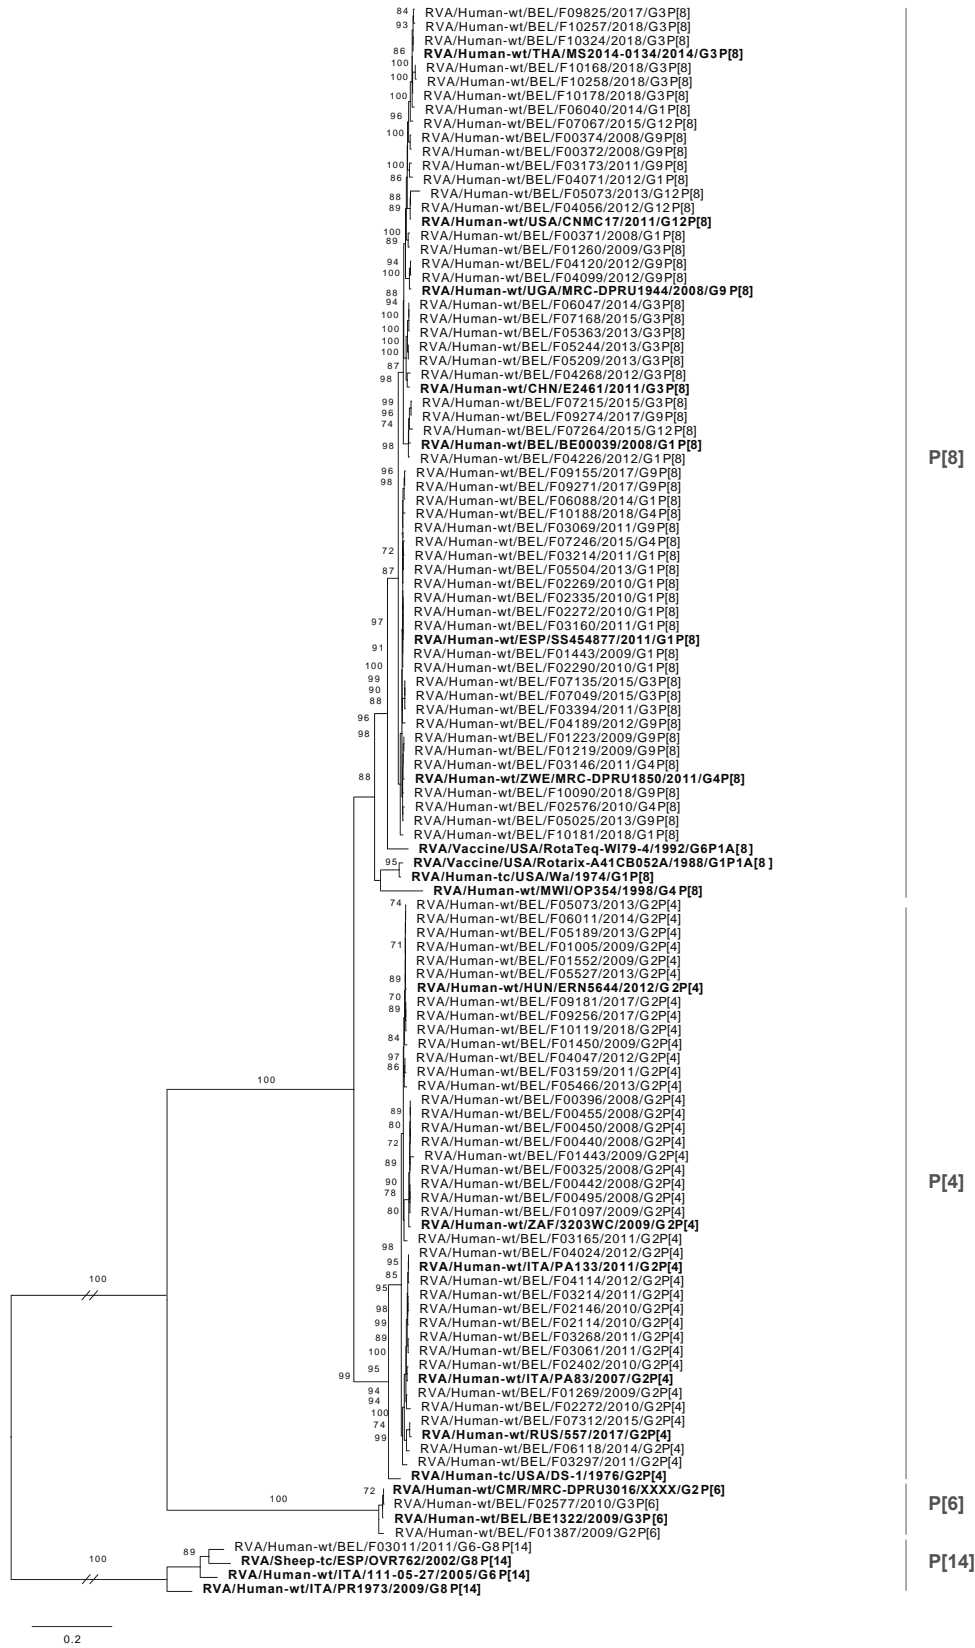

Figure S1. The maximum likelihood tree of the VP4 gene of the detected rotavirus sequences with reference rotavirus genomes. The reference genomes are marked in bold. The genotypes and lineages are shown next to the branches. Only the bootstrap values above 70% are shown. The branch lengths are drawn to scale and represent the nucleotide substitutions per site.

# VP1

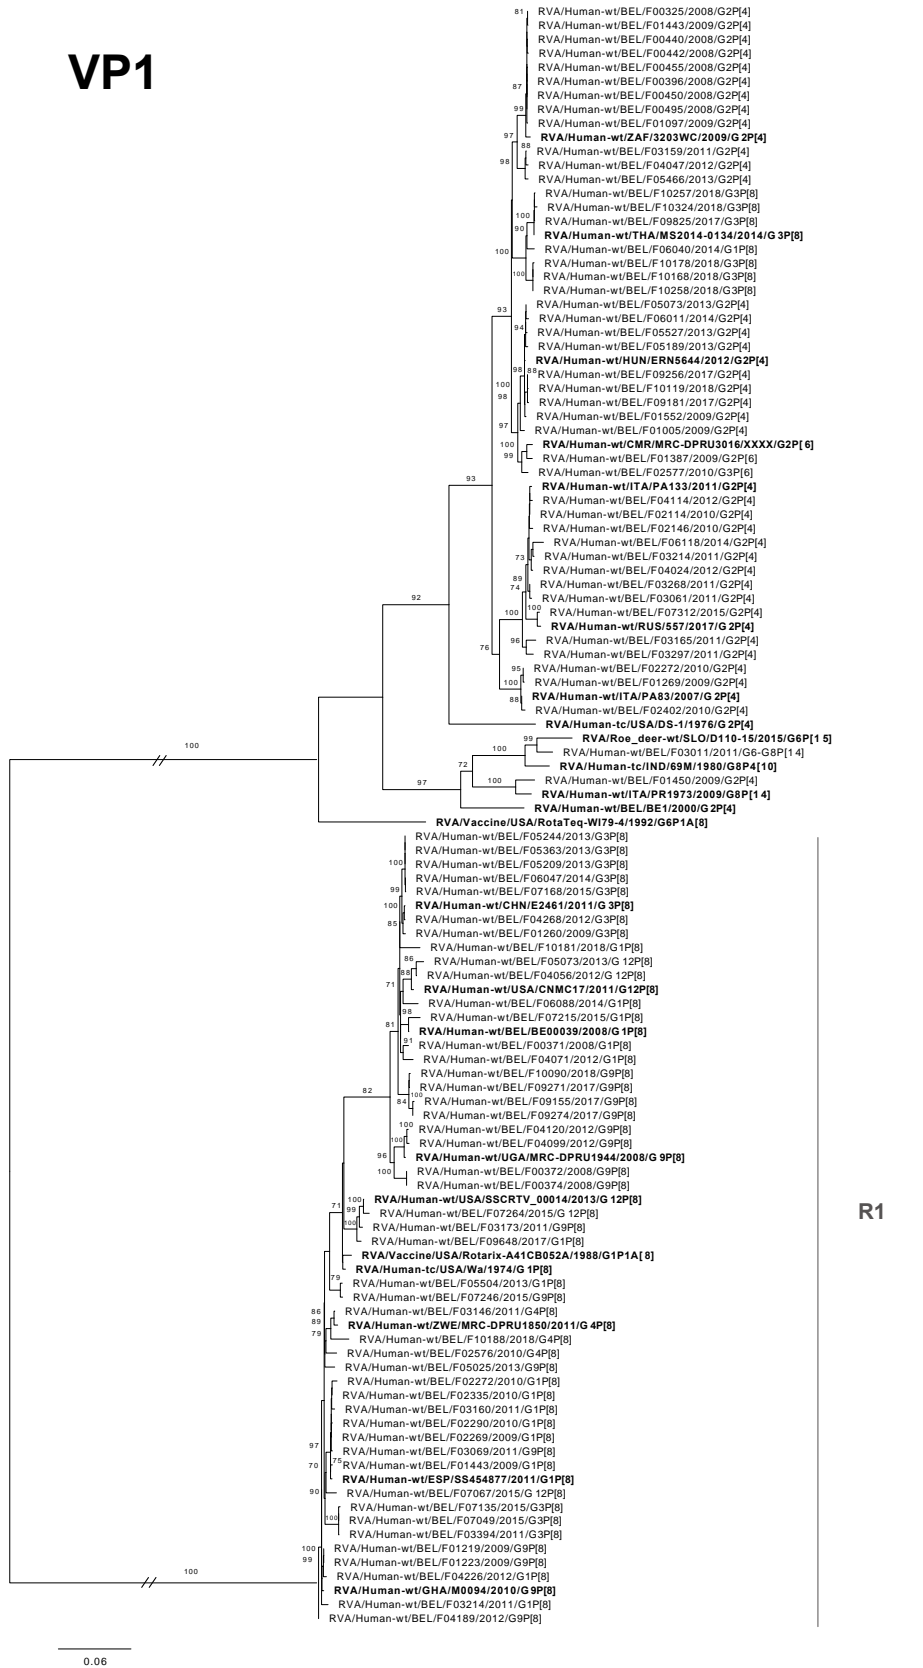

R2

R1

0.06

Figure S2. The maximum likelihood tree of the VP1 gene of the detected rotavirus sequences with reference rotavirus genomes. The reference genomes are marked in bold. The genotypes and lineages are shown next to the branches. Only the bootstrap values above 70% are shown. The branch lengths are drawn to scale and represent the nucleotide substitutions per site.

# VP2

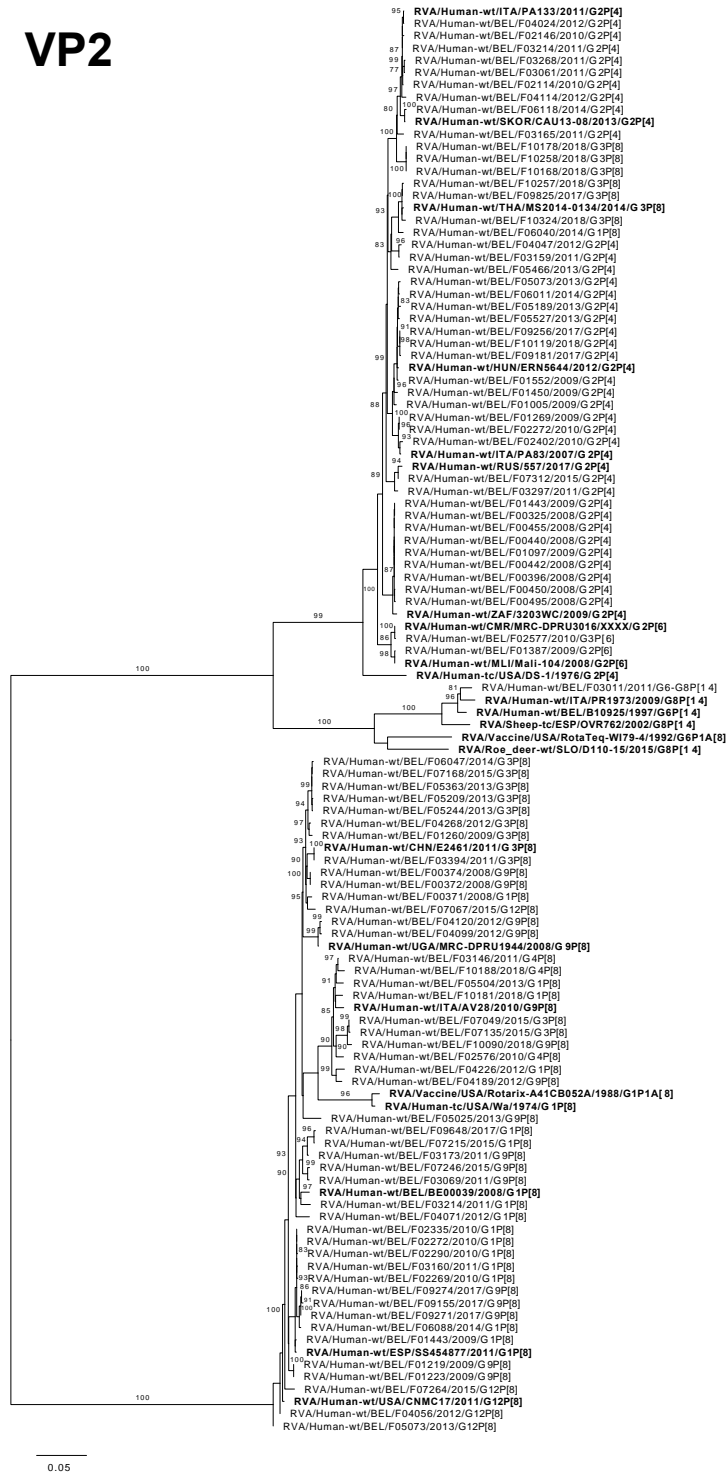

C2

C1

Figure S3. The maximum likelihood tree of the VP2 gene of the detected rotavirus sequences with reference rotavirus genomes. The reference genomes are marked in bold. The genotypes and lineages are shown next to the branches. Only the bootstrap values above 70% are shown. The branch lengths are drawn to scale and represent the nucleotide substitutions per site.

VP3

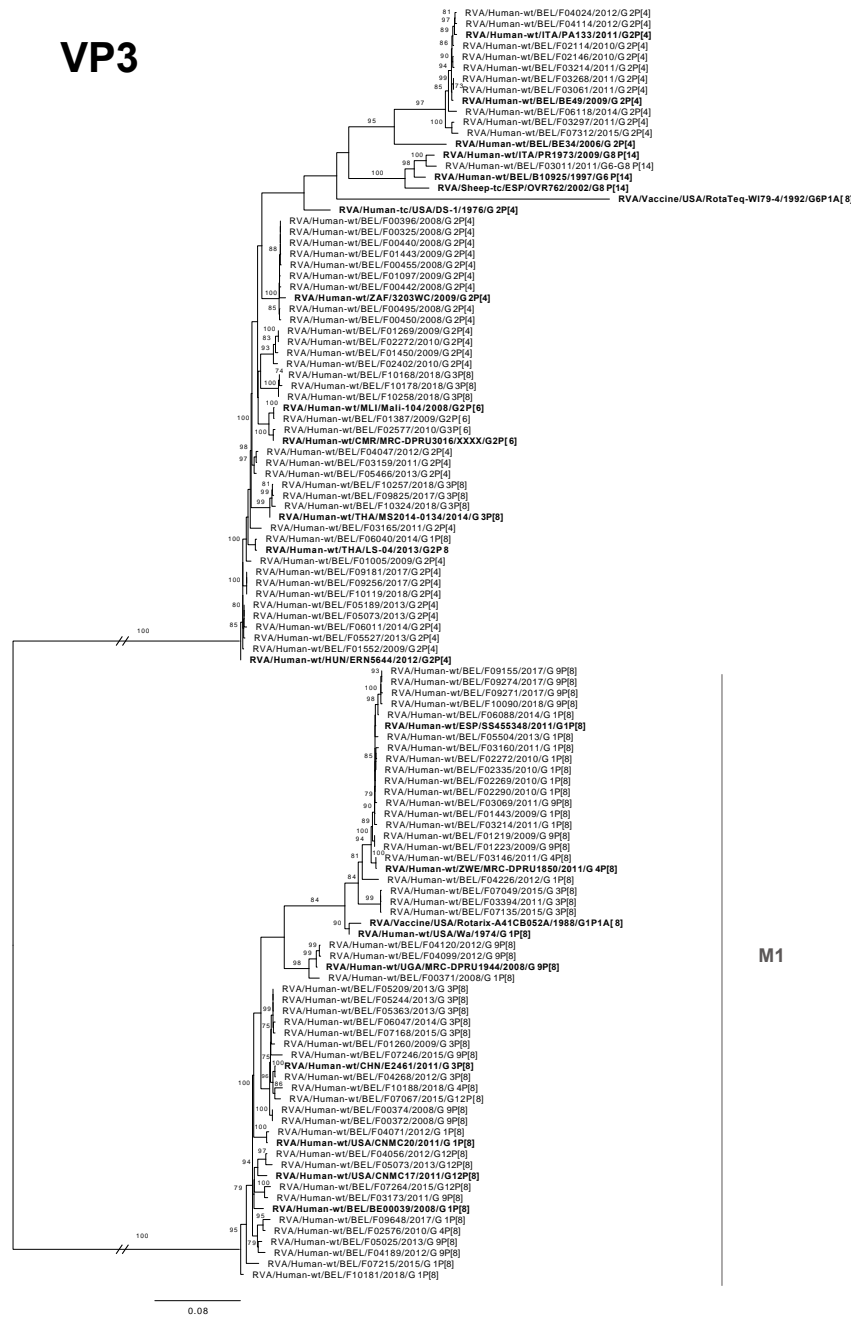

M2

M1

Figure S4. The maximum likelihood tree of the VP3 gene of the detected rotavirus sequences with reference rotavirus genomes. The reference genomes are marked in bold. The genotypes and lineages are shown next to the branches. Only the bootstrap values above 70% are shown. The branch lengths are drawn to scale and represent the nucleotide substitutions per site.



# VP6

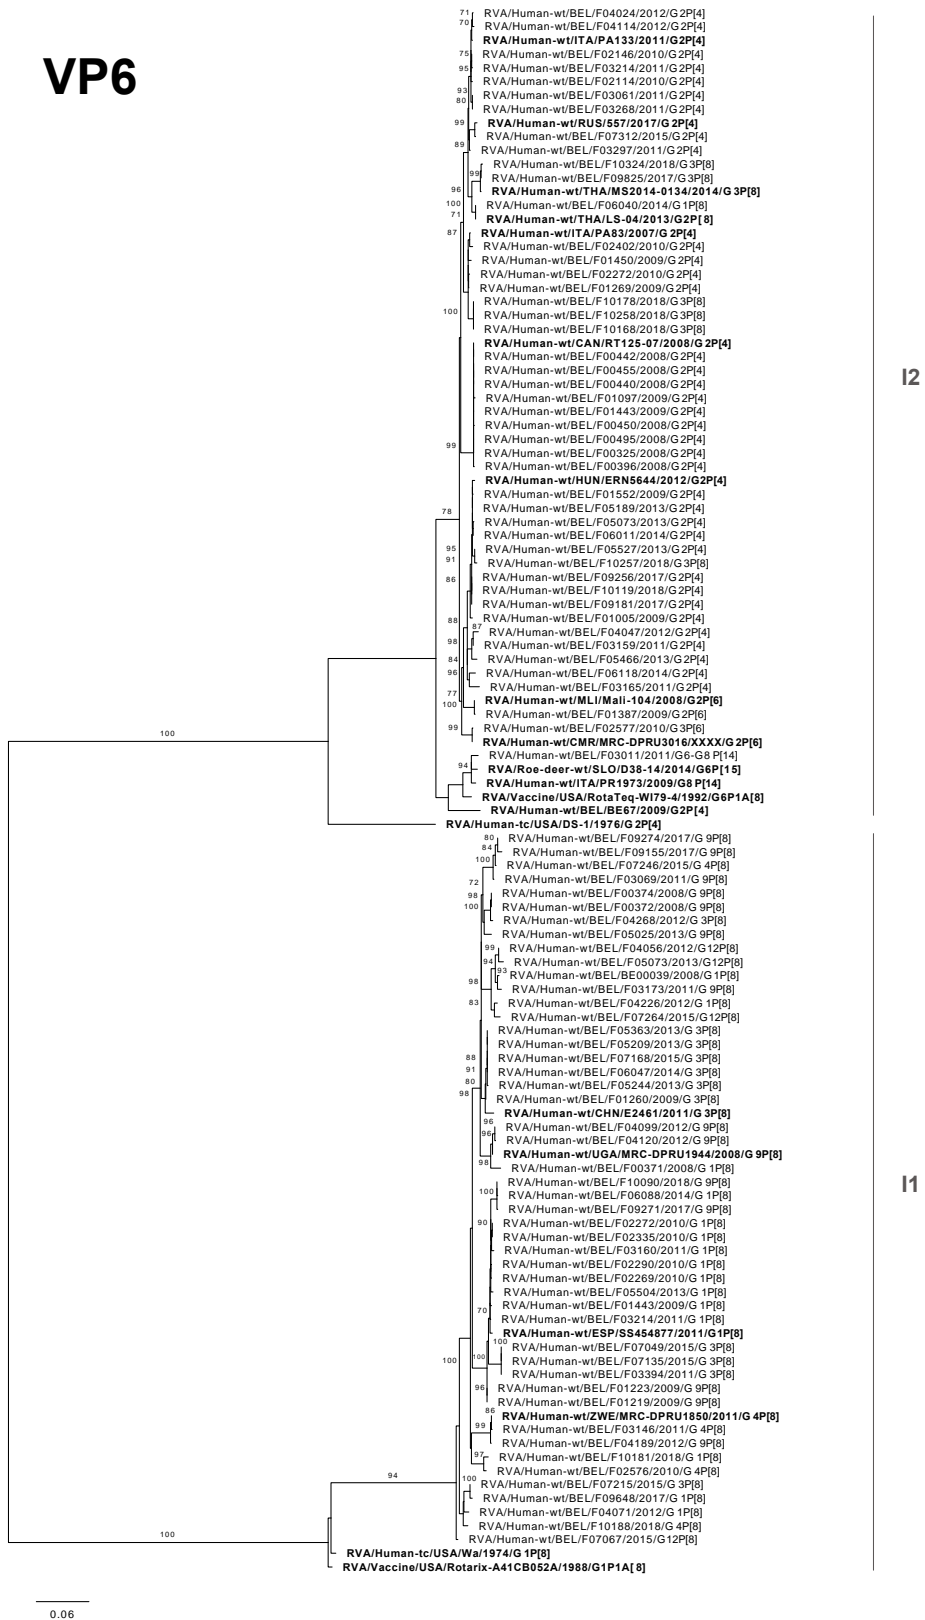

Figure S5. The maximum likelihood tree of the VP6 gene of the detected rotavirus sequences with reference rotavirus genomes. The reference genomes are marked in bold. The genotypes and lineages are shown next to the branches. Only the bootstrap values above 70% are shown. The branch lengths are drawn to scale and represent the nucleotide substitutions per site.

# NSP1

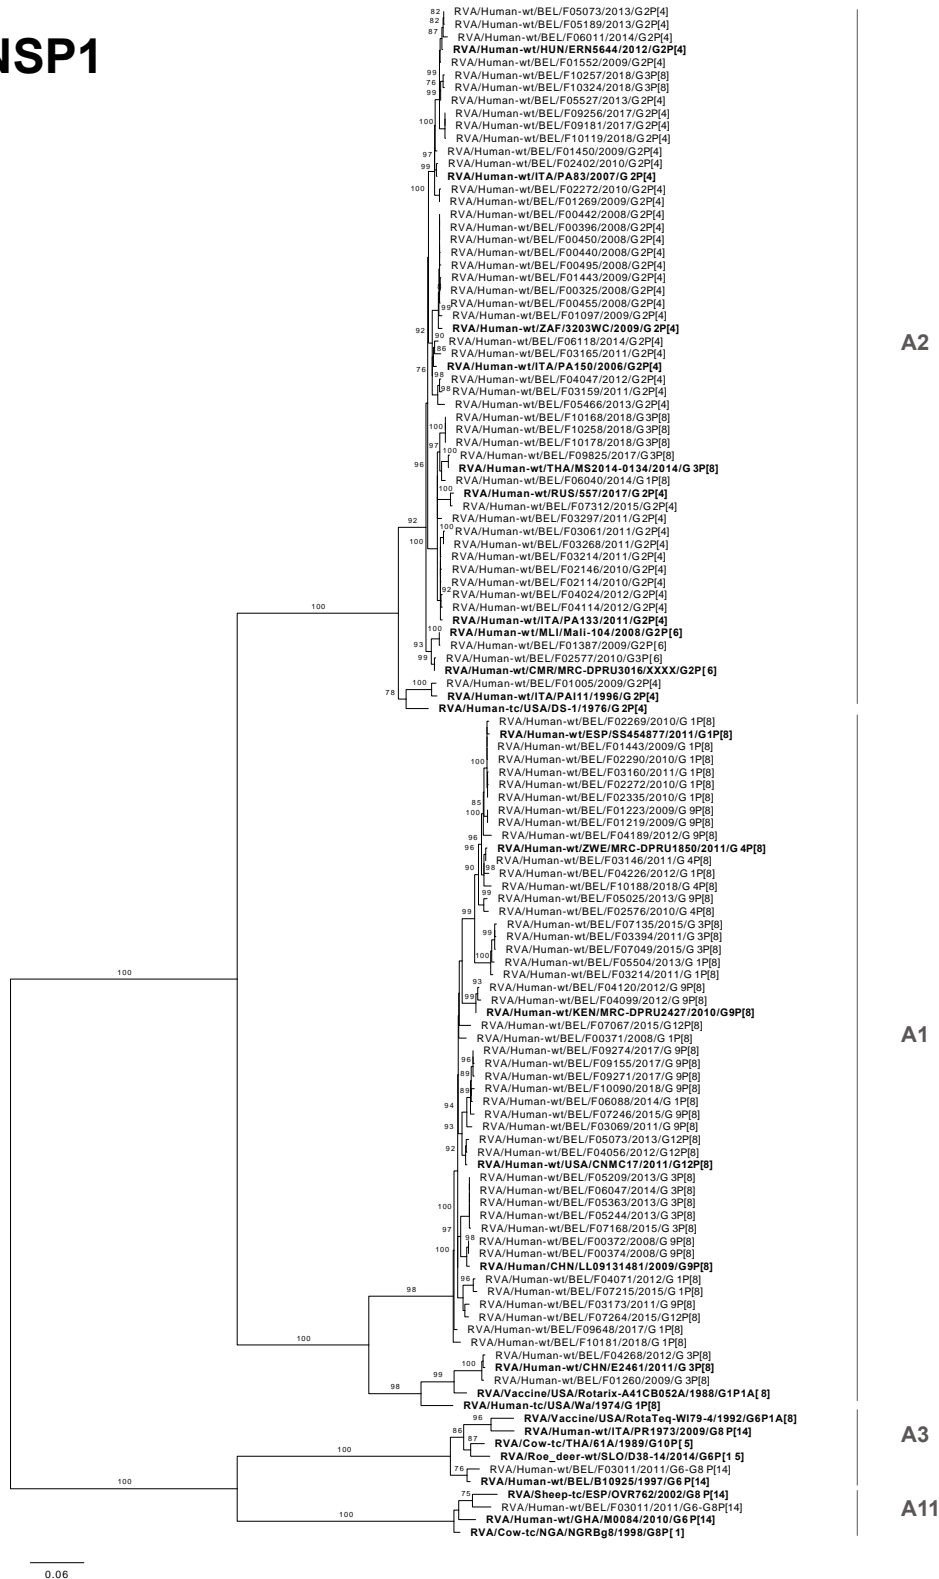

Figure S6. The maximum likelihood tree of the NSP1 gene of the detected rotavirus sequences with reference rotavirus genomes. The reference genomes are marked in bold. The genotypes and lineages are shown next to the branches. Only the bootstrap values above 70% are shown. The branch lengths are drawn to scale and represent the nucleotide substitutions per site.

# NSP2

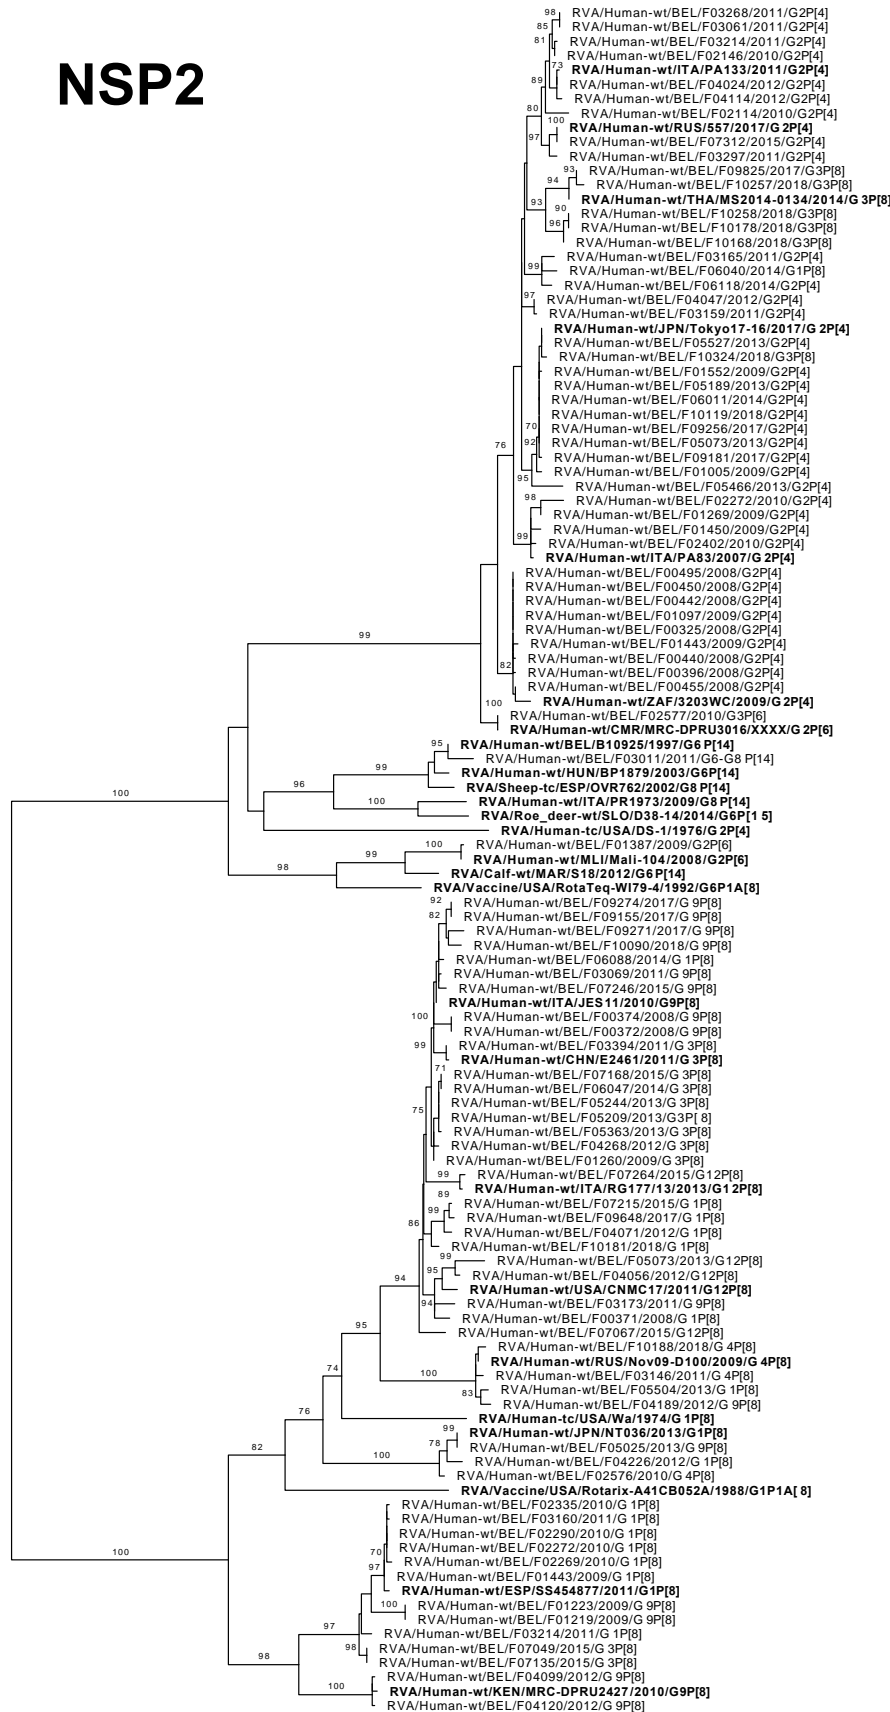

N2

N1

0.03

Figure S7. The maximum likelihood tree of the NSP2 gene of the detected rotavirus sequences with reference rotavirus genomes. The reference genomes are marked in bold. The genotypes and lineages are shown next to the branches. Only the bootstrap values above 70% are shown. The branch lengths are drawn to scale and represent the nucleotide substitutions per site.

# NSP3

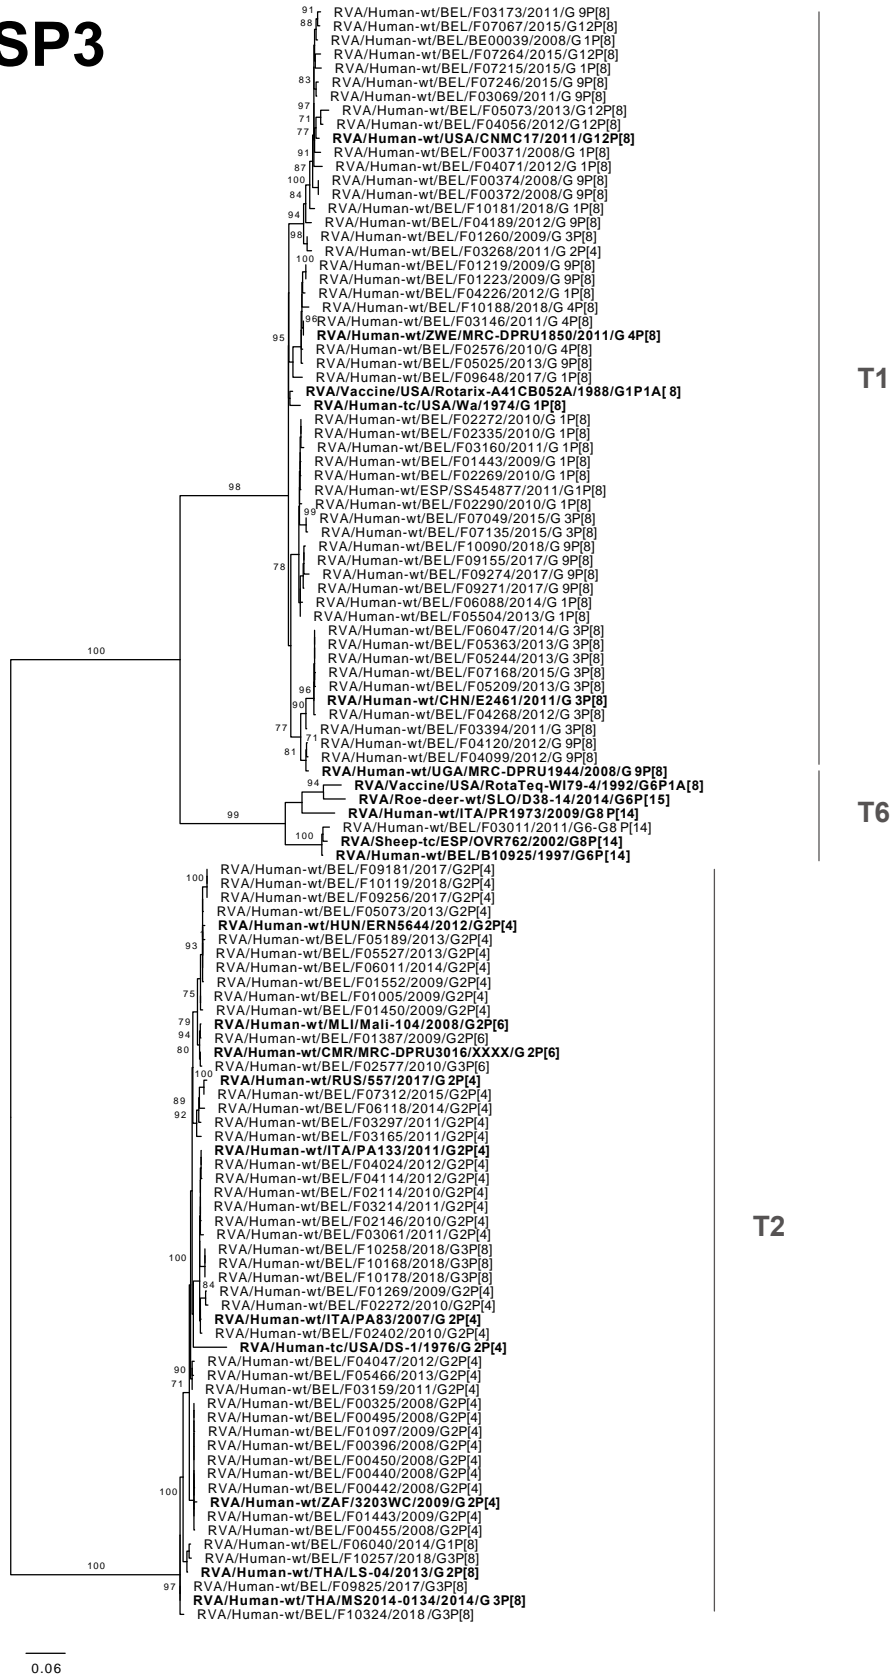

Figure S8. The maximum likelihood tree of the NSP3 gene of the detected rotavirus sequences with reference rotavirus genomes. The reference genomes are marked in bold. The genotypes and lineages are shown next to the branches. Only the bootstrap values above 70% are shown. The branch lengths are drawn to scale and represent the nucleotide substitutions per site.

# NSP4

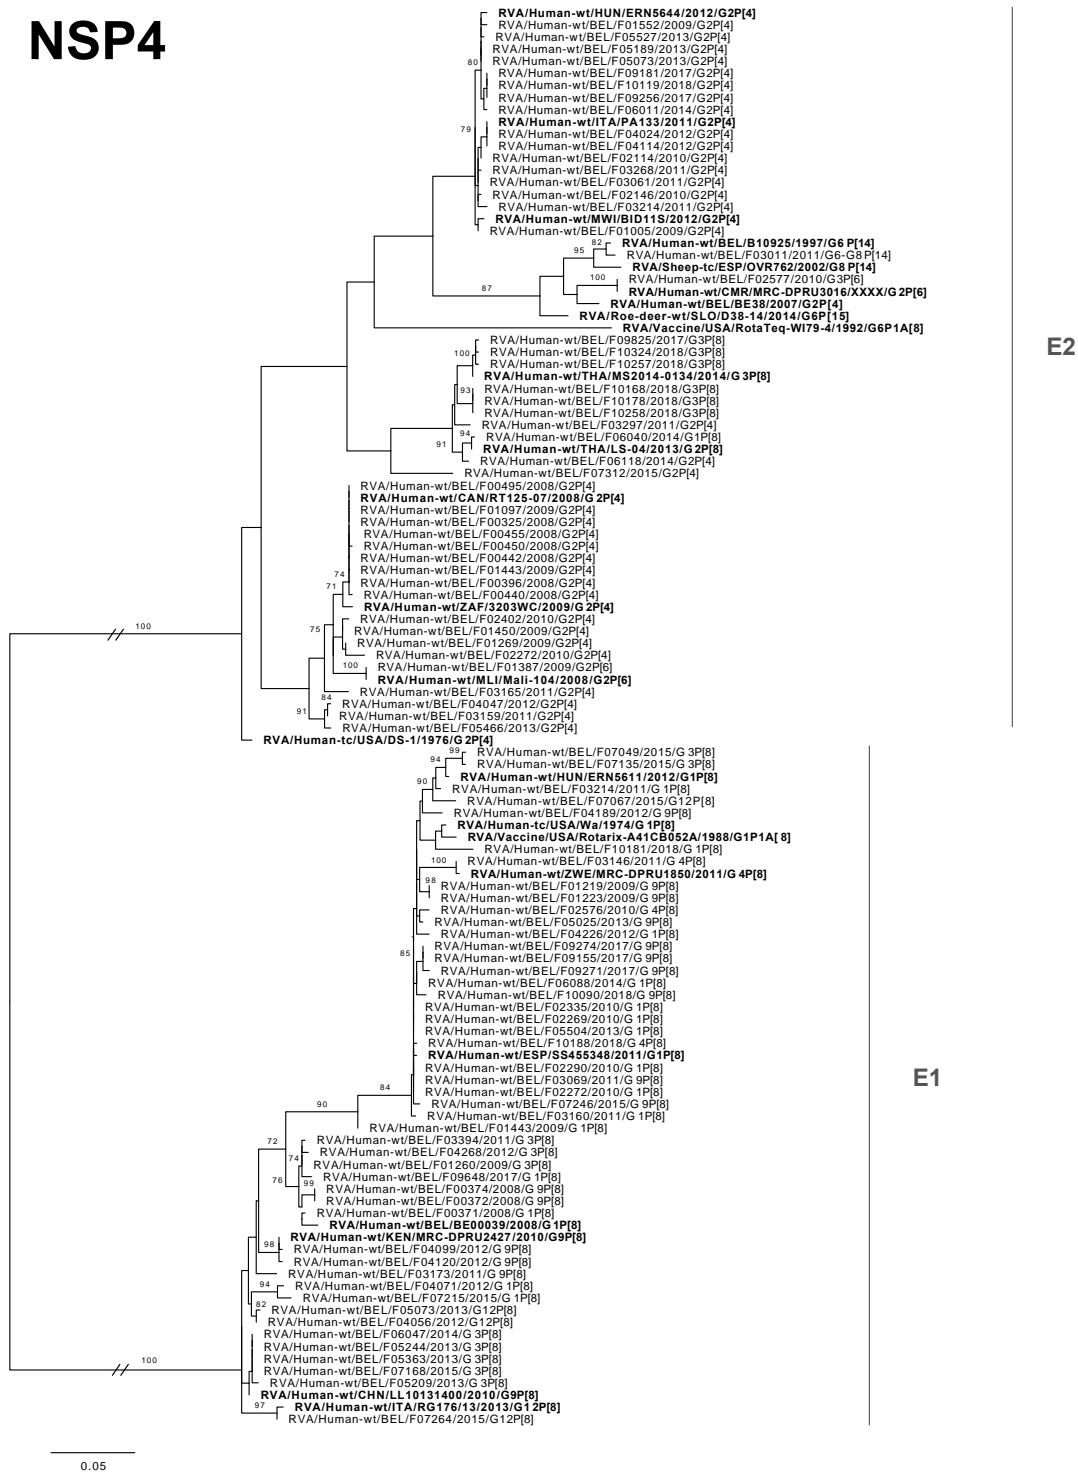

Figure S9. The maximum likelihood tree of the NSP4 gene of the detected rotavirus sequences with reference rotavirus genomes. The reference genomes are marked in bold. The genotypes and lineages are shown next to the branches. Only the bootstrap values above 70% are shown. The branch lengths are drawn to scale and represent the nucleotide substitutions per site.

# NSP5

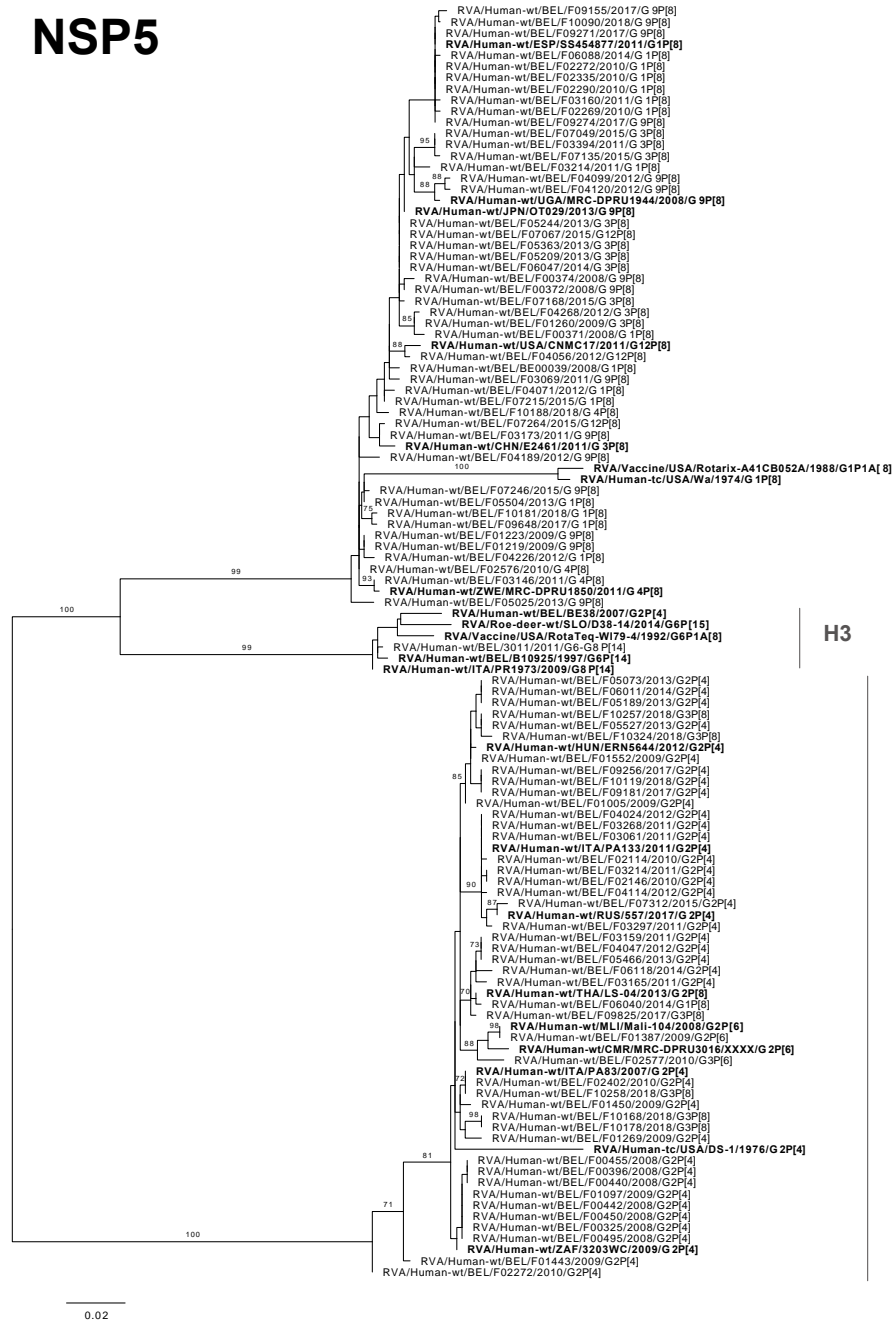

H1

H3

H2

Figure S10. The maximum likelihood tree of the NSP5 gene of the detected rotavirus sequences with reference rotavirus genomes. The reference genomes are marked in bold. The genotypes and lineages are shown next to the branches. Only the bootstrap values above 70% are shown. The branch lengths are drawn to scale and represent the nucleotide substitutions per site.
