# Supplementary material for: High Prevalence of Coinfecting Enteropathogens in Suspected Rotavirus Vaccine Breakthrough Cases
Source: PubMed Central journal article supplement (PMC8601229; doi:10.1128/jcm.01236-21), 2021-11-18
Supplement: jcm.01236-21-s0003.pdf [file jcm.01236-21-s0003.pdf]

## Supplementary Materials&Methods

Before the implementation as a diagnostic test, the qPCR efficiency of all 48 targets were studied based on 12 different gBlocks Gene fragments (Integrated DNA Technologies), containing all the target sequences. 10-fold dilution series ( $10^{-4}$ ,  $10^{-5}$ ,  $10^{-6}$ ,  $10^{-7}$ ,  $10^{-8}$ ) of each gBlock gene fragment enabled to assess the analytical performance of the qPCR assays.

Sensitivity and specificity analysis was based on the reference samples obtained from several sources:

- RIVM (Rijksinstituut voor Volksgezondheid en Milieu: National Institute for Public Health and the Environment):
  - o Astrovirus (type 1-8), sapovirus (type I.1, I.2, II.1, II.2 and IV.1) and norovirus (type II.17)
- ATCC-culture collection samples containing lyophilised genomic DNA of *Blastocystis hominis*, *Cryptosporidium parvum*, *Giardia lamblia*, *Entamoeba histolytica* or synthetic RNA for norovirus type I
- QCMD (Quality Control for Molecular Diagnostics) quality control samples (norovirus type II, norovirus type I)
- Amplirun (Vircell) DNA controls for STEC, ETEC, EAEC, EPEC and EIEC
- UZ Leuven: Astrovirus cultures
- UZ Antwerpen: *Schistosoma*-positive samples
- UZ Brussels, reference laboratory: Cultures of all types of EPEC
